# Supplementary material for: Conflicts of Interest in Medicine. A Systematic Review of Published and Scientifically evaluated Curricula
Source: PubMed Central journal article supplement (PMC5569982; doi:10.3205/zma001114), 2017-08-15
Supplement: JME-34-37-s-002.pdf [file JME-34-37-s-002.pdf]

| Author                     | Year | Country            | Target group          | Participants (n) | Duration (in hours) |
|----------------------------|------|--------------------|-----------------------|------------------|---------------------|
| Garb [19]                  | 1960 | USA                | Students              | 60               | 11                  |
| Daniel et al. [28]         | 1966 | Canada             | Students              | n.s.             | n.s.                |
| Palmisano & Edelstein [25] | 1980 | USA                | Students              | 2x100            | 1,5                 |
| Vinson, et al. [17]        | 1993 | USA                | Students              | 84               | 50 min              |
| Shaughnessy et al. [36]    | 1995 | USA                | Residents             | 12               | n.s.                |
| Anastasio & Little [26]    | 1996 | USA                | Residents and Faculty | 30               | 3                   |
| Shear et al. [31]          | 1996 | Canada & Australia | Students              | n.s.             | 1                   |
| Hopper et al. [27]         | 1997 | USA                | Residents and Faculty | 49               | 40 min              |
| Kelcher et al. [20]        | 1998 | Canada             | Residents             | 15               | 6                   |
| Wilkes & Hoffman [32]      | 2001 | USA                | Students              | 136              | 4                   |
| Agrawal et al. [18]        | 2004 | Canada             | Residents             | 48               | 2,5                 |
| Watkins & Kimberly [34]    | 2004 | USA                | Residents             | n.s.             | 4                   |
| Randall et al. [35]        | 2005 | USA                | Residents             | 22               | 1,5                 |
| Stanley et al. [33]        | 2005 | UK                 | Students              | n.s.             | 70                  |
| Wofford, Ohi [29]          | 2005 | USA                | Students              | 75               | 1,5                 |
| Schneider et al. [24]      | 2006 | USA                | Residents             | 118              | n.s.                |
| Tillmanns et al. [21]      | 2007 | USA & Germany      | Students              | 142              | 15                  |
| Merrill et al. [22]        | 2010 | USA                | Residents             | n.s.             | n.s.                |
| Kao et al. [23]            | 2011 | USA                | Students              | 474              | 3                   |
| Wall et al. [30]           | 2013 | USA                | Residents             | 27               | 5                   |
