# Supplementary material for: Conflicts of Interest in Medicine. A Systematic Review of Published and Scientifically evaluated Curricula
Source: PubMed Central journal article supplement (PMC5569982; doi:10.3205/zma001114), 2017-08-15
Supplement: JME-34-37-s-003.pdf [file JME-34-37-s-003.pdf]

| Author; year                                                  | Content of Questionnaire                                                                                                                                                                          | Results                                                                                                                                                                                                                                                                                                                                                                                                                                                                                                                                                                                                                                                                                                                                                                                                                                                                                                                                                                 | Scale / effect size / statistical significance                                                                                                                                                                                                                                        |
|---------------------------------------------------------------|---------------------------------------------------------------------------------------------------------------------------------------------------------------------------------------------------|-------------------------------------------------------------------------------------------------------------------------------------------------------------------------------------------------------------------------------------------------------------------------------------------------------------------------------------------------------------------------------------------------------------------------------------------------------------------------------------------------------------------------------------------------------------------------------------------------------------------------------------------------------------------------------------------------------------------------------------------------------------------------------------------------------------------------------------------------------------------------------------------------------------------------------------------------------------------------|---------------------------------------------------------------------------------------------------------------------------------------------------------------------------------------------------------------------------------------------------------------------------------------|
| <b>Pre- and posttest (&gt;3 months) and control group</b>     |                                                                                                                                                                                                   |                                                                                                                                                                                                                                                                                                                                                                                                                                                                                                                                                                                                                                                                                                                                                                                                                                                                                                                                                                         |                                                                                                                                                                                                                                                                                       |
| <b>Daniel et al. 1966 [28]</b>                                | Agreement to statements regarding pharmaceutical marketing                                                                                                                                        | <p>The students in the intervention group were more skeptical (8/8 items).</p> <ul style="list-style-type: none"> <li>• Drug companies are not accurate in their claims for their products.</li> <li>• Drug companies do not induce physicians to increase the cost of therapy by using new drugs when equally effective older remedies are available.</li> <li>• The claims made for drugs in mailed literature are not accurate.</li> <li>• The price of therapy when new drugs are used is unnecessarily high because of the existence of equally effective, older, cheaper remedies.</li> <li>• Information from detail men regarding claims about drugs is accurate.</li> <li>• Drugs are not placed on the market before being adequately tested.</li> <li>• Physicians are persuaded by advertising to use new drugs before they have been adequately tested.</li> <li>• Drug companies do not try to be accurate in their claims for their products.</li> </ul> | 4-pt.-Likert-scale / size or direction of change not specified / $p < 0.05$                                                                                                                                                                                                           |
| <b>Schneider et al. 2005 [24]</b>                             | Appropriateness of different interactions with pharmaceutical companies                                                                                                                           | <p>1/17 items were rated as less appropriate by the intervention group.</p> <ul style="list-style-type: none"> <li>• Sponsored lunch</li> </ul>                                                                                                                                                                                                                                                                                                                                                                                                                                                                                                                                                                                                                                                                                                                                                                                                                         | Scale and size not specified / $p = 0.042$                                                                                                                                                                                                                                            |
| <b>Pre- and posttest (&gt;3 months) without control group</b> |                                                                                                                                                                                                   |                                                                                                                                                                                                                                                                                                                                                                                                                                                                                                                                                                                                                                                                                                                                                                                                                                                                                                                                                                         |                                                                                                                                                                                                                                                                                       |
| <b>Shaughnessy et al. 1995 [36]</b>                           | Agreement to statements regarding interactions with pharmaceutical companies                                                                                                                      | <p>3/10 items with a significant change toward more skeptical attitudes. In some other items, trend in the opposite direction.</p> <ul style="list-style-type: none"> <li>• Discussion with PRs has no impact on my prescribing behavior.</li> <li>• Acceptance of promotional items from PRs has no impact on my prescribing behavior.</li> <li>• PRs help to support important conferences and speakers at this institution.</li> </ul>                                                                                                                                                                                                                                                                                                                                                                                                                                                                                                                               | <p>Average on a 5-pt.-Likert-scale, 1=strongly agree</p> <ul style="list-style-type: none"> <li>• 3.3 (+0.2, <math>p &lt; 0.05</math>)</li> <li>• 2.3 (+0.5, <math>p &lt; 0.05</math>)</li> <li>• 2.2 (+0.5, <math>p &lt; 0.05</math>)</li> </ul>                                     |
| <b>Wilkes &amp; Hoffman 2001 [32]</b>                         | <p>Agreement to statements about interactions between doctors and pharmaceutical companies</p> <p>Agreement to statements about ethical aspects of interactions with pharmaceutical companies</p> | <p>In 4/26 items, the students showed a more critical attitude after the intervention.</p> <ul style="list-style-type: none"> <li>• When drug companies sponsor physicians to go to seminars at resort locations this biases the subsequent behavior of those physicians (e.g., they prescribe more of the company's product).</li> <li>• When drug companies give physicians pens, calendars, or other non-educational materials, this biases the subsequent behavior of those physicians.</li> <li>• Product information presented in a drug advertisement provides you with educational material about the drug.</li> <li>• It is unethical for physicians to accept drug company funding to attend seminars at resort locations.</li> </ul> <p>For 10 other items, there was a trend in the same direction that was not statistically significant.</p>                                                                                                              | <p>Percentage of participants that agreed</p> <ul style="list-style-type: none"> <li>• 46% (+28%, <math>p &lt; 0.05</math>)</li> <li>• 20% (+ 7%, <math>p &lt; 0.05</math>)</li> <li>• 43% (-6%, <math>p &lt; 0.01</math>)</li> <li>• 33% (+ 7%, <math>p &lt; 0.05</math>)</li> </ul> |

|                                                           |                                                                                                                    |                                                                                                                                                                                                                                                                                                                                                                                                                                                                                                                                                                                                                                                                                                                                                                                                                                                                 |                                                                                                                                                                                                                                                                                                                                                                                                                                                   |
|-----------------------------------------------------------|--------------------------------------------------------------------------------------------------------------------|-----------------------------------------------------------------------------------------------------------------------------------------------------------------------------------------------------------------------------------------------------------------------------------------------------------------------------------------------------------------------------------------------------------------------------------------------------------------------------------------------------------------------------------------------------------------------------------------------------------------------------------------------------------------------------------------------------------------------------------------------------------------------------------------------------------------------------------------------------------------|---------------------------------------------------------------------------------------------------------------------------------------------------------------------------------------------------------------------------------------------------------------------------------------------------------------------------------------------------------------------------------------------------------------------------------------------------|
| <b>Anastasio &amp; Little 1996 [26]</b>                   | Confidence in interactions with pharmaceutical sales representatives                                               | <p>In 10/10 items a statistically significant change toward more self confidence</p> <ul style="list-style-type: none"> <li>• Time management</li> <li>• Control of the agenda</li> <li>• Analyzing research results</li> <li>• Giving feedback</li> <li>• Identifying marketing techniques</li> <li>• Managing marketing techniques</li> <li>• Managing the acceptance of gifts</li> <li>• Asking for information</li> <li>• Asking for drug samples</li> <li>• Getting useful information</li> </ul>                                                                                                                                                                                                                                                                                                                                                          | <p>Average on a 4-pt.-Likert-scale, 4= very self-confident**</p> <ul style="list-style-type: none"> <li>• 3.1 (+0.7, p&lt;0.05)</li> <li>• 3.2 (+1, p&lt;0.05)</li> <li>• 2.7 (+0.6, p&lt;0.05)</li> <li>• 3.1 (+0.8, p&lt;0.05)</li> <li>• 3.3 (+1.1, p&lt;0.05)</li> <li>• 3.2 (+1.1, p&lt;0.05)</li> <li>• 3.2 (+0.3, p&lt;0.05)</li> <li>• 3.4 (+0.7, p&lt;0.05)</li> <li>• 3.2 (+0.5, p&lt;0.05)</li> <li>• 3.3 (+0.7, p&lt;0.05)</li> </ul> |
| <b>Pre- and posttest (&lt;3 months) and control group</b> |                                                                                                                    |                                                                                                                                                                                                                                                                                                                                                                                                                                                                                                                                                                                                                                                                                                                                                                                                                                                                 |                                                                                                                                                                                                                                                                                                                                                                                                                                                   |
| <b>Vinson et al. 1993 [17]</b>                            | Willingness to accept gifts                                                                                        | <p>The participants showed a lower willingness to accept gifts for 6/11 gifts.</p> <ul style="list-style-type: none"> <li>• Medical textbook</li> <li>• Promotional brochure</li> <li>• Medical journal that is solely funded through advertising</li> <li>• Pen</li> <li>• Evening educational event</li> <li>• Travel costs to a scientific event in a resort hotel</li> </ul>                                                                                                                                                                                                                                                                                                                                                                                                                                                                                | size not specified / p=0.03                                                                                                                                                                                                                                                                                                                                                                                                                       |
| <b>Hopper et al. 1997 [27]</b>                            | Attitudes toward different interactions with pharmaceutical companies                                              | <p>For 3/8 statements there was a change in attitude toward a more skeptical attitude of the intervention compared to the control group.</p> <ul style="list-style-type: none"> <li>• Interactions with PRs are likely to influence the prescribing behavior of other physicians in negative ways</li> <li>• PRs may use unethical marketing practices</li> <li>• It is ethically appropriate to receive marketing gifts without patient benefit</li> </ul>                                                                                                                                                                                                                                                                                                                                                                                                     | <p>Change on a 5 pt.-Likert-scale; 5=strong agreement</p> <ul style="list-style-type: none"> <li>• 0.13 (control: -0.4); p=0.046</li> <li>• 0.63 (control: -0.2); p=0.007</li> <li>• -0.37 (control: 0.24); p=0.050</li> </ul>                                                                                                                                                                                                                    |
| <b>Kao et al. 2011 [23]</b>                               | <p>Perceived influence of marketing</p> <p>Attitude toward a ban of interactions with pharmaceutical companies</p> | <p>More students in the intervention group agreed that certain interactions are influential and fewer students showed a bias blind spot.</p> <ul style="list-style-type: none"> <li>• Receiving gifts or food from a pharmaceutical representative increases the chance I will eventually prescribe the company's drug.</li> <li>• Marketing or promotional activities have a moderate or significant influence on physician prescribing decisions</li> <li>• Food/gifts do not influence my own prescribing decisions, but those of my fellow medical students.</li> </ul> <p>More students in the intervention group agreed, that certain interactions should be completely banned:</p> <ul style="list-style-type: none"> <li>• Pharmaceutical sales representatives - doctors</li> <li>• Pharmaceutical sales representatives - medical students</li> </ul> | <p>Percentage of participants that agreed</p> <ul style="list-style-type: none"> <li>• 55.4% (OR 1.68 vs. control group)</li> <li>• 72.2% (OR 2.29 vs. control group)</li> <li>• 5.9% (OR 0.34 vs. control group)</li> <li>• 51.9% (OR 3.44 vs. control group)</li> <li>• 57.1% (OR 1.99 vs. control group)</li> </ul>                                                                                                                            |

|                                                                      |                                                                                                                                                                                                                                                                                           |                                                                                                                                                                                                                                                                                                                                                                                                                                                                                                                                                                                                                                                                                                                                                                                                                                                                                                                                                                                              |                                                                                                                                                                                                                                                                                                                                                                                                                                                                                                                                                                                                                                                                                                                                                                 |
|----------------------------------------------------------------------|-------------------------------------------------------------------------------------------------------------------------------------------------------------------------------------------------------------------------------------------------------------------------------------------|----------------------------------------------------------------------------------------------------------------------------------------------------------------------------------------------------------------------------------------------------------------------------------------------------------------------------------------------------------------------------------------------------------------------------------------------------------------------------------------------------------------------------------------------------------------------------------------------------------------------------------------------------------------------------------------------------------------------------------------------------------------------------------------------------------------------------------------------------------------------------------------------------------------------------------------------------------------------------------------------|-----------------------------------------------------------------------------------------------------------------------------------------------------------------------------------------------------------------------------------------------------------------------------------------------------------------------------------------------------------------------------------------------------------------------------------------------------------------------------------------------------------------------------------------------------------------------------------------------------------------------------------------------------------------------------------------------------------------------------------------------------------------|
| <p><b>Randall et al. 2005 [35]</b></p>                               | <p>Agreement with statements regarding interactions with pharmaceutical companies</p> <p>Acceptance of gifts (self-report)</p>                                                                                                                                                            | <p>No difference</p> <p>After the intervention, the participants reduced 2 of 7 interactions with pharmaceutical companies</p> <ul style="list-style-type: none"> <li>Miscellaneous office supplies</li> <li>Non-educational gifts</li> </ul>                                                                                                                                                                                                                                                                                                                                                                                                                                                                                                                                                                                                                                                                                                                                                | <ul style="list-style-type: none"> <li>-</li> </ul> <p>Reduction compared to baseline</p> <ul style="list-style-type: none"> <li>35% (F=17.28, p=0.0001)</li> <li>20% (F=4.83, p=0.032)</li> </ul>                                                                                                                                                                                                                                                                                                                                                                                                                                                                                                                                                              |
| <p><b>Pre- and posttest (&lt;3 months) without control group</b></p> |                                                                                                                                                                                                                                                                                           |                                                                                                                                                                                                                                                                                                                                                                                                                                                                                                                                                                                                                                                                                                                                                                                                                                                                                                                                                                                              |                                                                                                                                                                                                                                                                                                                                                                                                                                                                                                                                                                                                                                                                                                                                                                 |
| <p><b>Watkins &amp; Kimberly 2004 [34]</b></p>                       | <p>Multiple Choice Test; content not specified</p>                                                                                                                                                                                                                                        | <p>The participants had a better score after the intervention</p>                                                                                                                                                                                                                                                                                                                                                                                                                                                                                                                                                                                                                                                                                                                                                                                                                                                                                                                            | <p>Percentage of correct answers / 86% (+53%) / p not specified</p>                                                                                                                                                                                                                                                                                                                                                                                                                                                                                                                                                                                                                                                                                             |
| <p><b>Agrawal et al. 2004 [18]</b></p>                               | <p>Ethical appropriateness and value of different marketing instruments</p> <p>Plans for future use of certain marketing instruments</p> <p>Use of certain marketing instruments in the past month</p> <p>Self confidence in identifying and managing different marketing instruments</p> | <p>The participants rated certain marketing instruments as less appropriate (3/5) and less valuable (2/3) (statistically significant); there was a trend in the same direction for all items.</p> <p>Ethical appropriateness in general</p> <ul style="list-style-type: none"> <li>Drug samples</li> <li>Free meals</li> <li>Gift less than CAN \$10</li> </ul> <p>Value in general</p> <ul style="list-style-type: none"> <li>Drug sample</li> <li>Industry-sponsored continuing medical education</li> </ul> <p>The participants planned to use marketing instruments more rarely (statistically significant for 5/6 marketing instruments).</p> <p>In general</p> <ul style="list-style-type: none"> <li>Drug sample</li> <li>Industry-sponsored continuing medical education</li> <li>One-on-one interactions with industry representatives</li> <li>Gifts less than CAN \$10</li> </ul> <p>No statistically significant differences</p> <p>No statistically significant differences</p> | <p>Averages on a 5-pt.-Likert-scale (5=very appropriate or very valuable)</p> <p>n.s., p&lt;0.05</p> <ul style="list-style-type: none"> <li>3.4 (-0.5, p&lt;0.01)</li> <li>2.3 (-0.3, p&lt;0.01)</li> <li>2.1 (-0.7, p&lt;0.01)</li> </ul> <p>n.s., p&lt;0.05</p> <ul style="list-style-type: none"> <li>3.8 (-0.5), p&lt;0.01</li> <li>3.3 (-0.4), p&lt;0.01</li> </ul> <p>Averages on a 5-pt.-Likert-scale (5=at every possible opportunity, 1=never)</p> <p>n.s., p&lt;0.01</p> <ul style="list-style-type: none"> <li>3.1 (-0.5, p&lt;0.01)</li> <li>2.7 (-0.5, p&lt;0.01)</li> <li>2.2 (-0.3, p&lt;0.01)</li> <li>2.7 (-0.6, p&lt;0.01)</li> </ul> <ul style="list-style-type: none"> <li>-</li> </ul> <ul style="list-style-type: none"> <li>-</li> </ul> |
| <p><b>Stanley et al. 2005 [33]</b></p>                               | <p>Knowledge about the pharmaceutical industry</p>                                                                                                                                                                                                                                        | <p>Participants had a better score after the intervention compared to before</p>                                                                                                                                                                                                                                                                                                                                                                                                                                                                                                                                                                                                                                                                                                                                                                                                                                                                                                             | <p>Average percentage of correct answers with standard error: 56.8% +/- 3.3 after the intervention vs. 32.9% +/-3.7 before</p>                                                                                                                                                                                                                                                                                                                                                                                                                                                                                                                                                                                                                                  |

|                                    |                                                                                                                                                                           |                                                                                                                                                                                                                                                                                                                                                                                                                                                                                                                                                                                                                                                                                                                                                                                                                                                                                         |                                                                                                                                                                                                                                                   |
|------------------------------------|---------------------------------------------------------------------------------------------------------------------------------------------------------------------------|-----------------------------------------------------------------------------------------------------------------------------------------------------------------------------------------------------------------------------------------------------------------------------------------------------------------------------------------------------------------------------------------------------------------------------------------------------------------------------------------------------------------------------------------------------------------------------------------------------------------------------------------------------------------------------------------------------------------------------------------------------------------------------------------------------------------------------------------------------------------------------------------|---------------------------------------------------------------------------------------------------------------------------------------------------------------------------------------------------------------------------------------------------|
|                                    | Attitudes toward the pharmaceutical industry                                                                                                                              | <p>Participants showed a more positive attitude toward pharmaceutical companies in 2/6 items.</p> <ul style="list-style-type: none"> <li>The pharmaceutical industry overcharges the National Health Service.</li> <li>Pharmaceutical company bosses are 'fat cats'.</li> </ul>                                                                                                                                                                                                                                                                                                                                                                                                                                                                                                                                                                                                         | <p>Average agreement on an 11-point-Likert-scale (0-10, 10= strong agreement) **</p> <ul style="list-style-type: none"> <li>ca. 5.5 (ca. -1, p&lt;0.05)</li> <li>ca. 5.5 (ca. -1, p&lt;0.05)</li> </ul>                                           |
| <b>Wofford &amp; Ohi 2005 [29]</b> | Attitudes toward interactions with PSRs                                                                                                                                   | <p>For 2/4 items, participants showed a more positive attitude toward PSRs after the intervention (statistically significant).</p> <ul style="list-style-type: none"> <li>Detailing of pharmaceutical representatives has educational value for practicing physicians.</li> <li>Detailing of pharmaceutical representatives has educational value for medical students.</li> </ul> <p>For 1/4 items, there was a trend toward a more positive attitude after the intervention.</p> <ul style="list-style-type: none"> <li>Information provided by pharmaceutical representatives is biased.</li> </ul> <p>For 1/4 items, participants showed a more skeptical attitude toward PSR after the intervention (statistically significant)</p> <ul style="list-style-type: none"> <li>Pharmaceutical representatives are influential with regard to physicians' prescribing habits</li> </ul> | <p>Proportion of participants that agreed with the statement</p> <ul style="list-style-type: none"> <li>43.2% (+25.5%, p&lt;0.0001)</li> <li>40.5% (+18.4%, p=0.0007)</li> <li>72.9% (-11.2%, p=0.065)</li> <li>62.1% (+7.9%, p=0.004)</li> </ul> |
| <b>Wall et al. 2013 [30]</b>       | Attitudes toward interactions with PSRs                                                                                                                                   | <p>For 1/6 questions there was a statistically significant difference compared to before the intervention</p> <ul style="list-style-type: none"> <li>Counter-detailing helps me better understand the proper use of medications detailed by Pharm Reps.</li> </ul>                                                                                                                                                                                                                                                                                                                                                                                                                                                                                                                                                                                                                      | <p>Agreement on a 5-pt.-Likert-scale, 5=strongly agree</p> <ul style="list-style-type: none"> <li>5 (+1, p&lt;0.01)</li> </ul>                                                                                                                    |
| <b>Tillmanns et al. 2007 [21]</b>  | <p>Self-assessment of knowledge regarding interactions with the pharmaceutical industry</p> <p>Interest in the topic of interactions with the pharmaceutical industry</p> | <p>Participants rated their knowledge to be higher after the intervention</p> <p>Participants were more interested in the topic after the intervention</p>                                                                                                                                                                                                                                                                                                                                                                                                                                                                                                                                                                                                                                                                                                                              | <p>11-pt. rating scale (0-10, 10= the most knowledge); ca. 7.5 (ca. +3.8, p=0.00)**</p> <p>11-pt. rating scale (0-10, 10= the most interest); ca. 7.8 (ca. +0.8, p=0.02)**</p>                                                                    |
| <b>Only posttest</b>               |                                                                                                                                                                           |                                                                                                                                                                                                                                                                                                                                                                                                                                                                                                                                                                                                                                                                                                                                                                                                                                                                                         |                                                                                                                                                                                                                                                   |
| <b>Kelcher et al. 1998 [20]</b>    | <p>Evaluation of an interaction with a PSR</p> <p>Evaluation of the intervention</p>                                                                                      | <p>In discussions, residents could name advantages and disadvantages as well as costs of the drugs. Residents and the faculty discussing with them felt better informed after the intervention.</p> <ul style="list-style-type: none"> <li>The participants felt better prepared for the interactions with PSRs and thought the course should continue to be offered.</li> <li>The participants thought that regular visits from PSRs are not important or of small importance.</li> </ul>                                                                                                                                                                                                                                                                                                                                                                                              | <ul style="list-style-type: none"> <li>-</li> <li>11/12 (92%)</li> <li>6/12 (50%)</li> </ul>                                                                                                                                                      |

|                                                                                                                                     |                           |                                                                                                                                                                                                                       |                                                     |
|-------------------------------------------------------------------------------------------------------------------------------------|---------------------------|-----------------------------------------------------------------------------------------------------------------------------------------------------------------------------------------------------------------------|-----------------------------------------------------|
| <b>Only pretest</b>                                                                                                                 |                           |                                                                                                                                                                                                                       |                                                     |
| <b>Palmisano &amp; Edelstein 1980 [25]</b>                                                                                          | Appropriateness of a gift | <ul style="list-style-type: none"> <li>Before the intervention, 46% of participants thought it was inappropriate for a medical student to accept a gift with a value of 50\$ from a pharmaceutical company</li> </ul> | <ul style="list-style-type: none"> <li>-</li> </ul> |
| * Where not otherwise specified, the result at posttest is reported with the absolute change compared to the pretest in parentheses |                           |                                                                                                                                                                                                                       |                                                     |
| ** Results read from a graph or figure, no exact numbers were reported in the publication                                           |                           |                                                                                                                                                                                                                       |                                                     |
